# Supplementary material
Source: PubMed Central journal article supplement (PMC3223303)
Supplement: ismej201163x1.pdf [file ismej201163x1.pdf]

1 Supplement

2

3

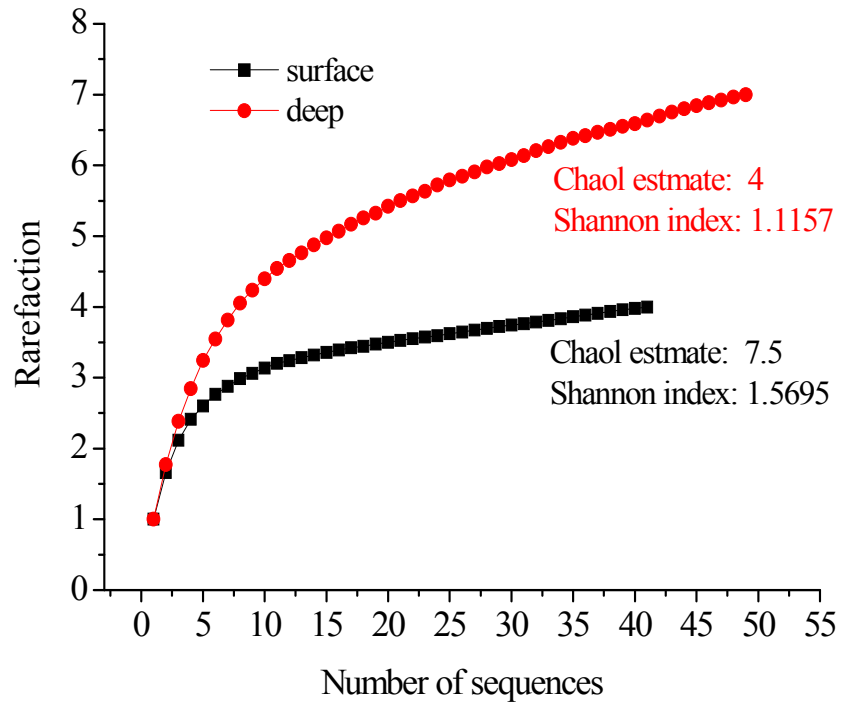

4

5 **Fig. S1.** Rarefaction analysis of anammox bacterial communities at the surface and deep of paddy  
6 soil. DOTUR program was used with 3% sequence variation as OTU determination

7

8

9

10

11

12

13

14

15

16

17

18

1  
2

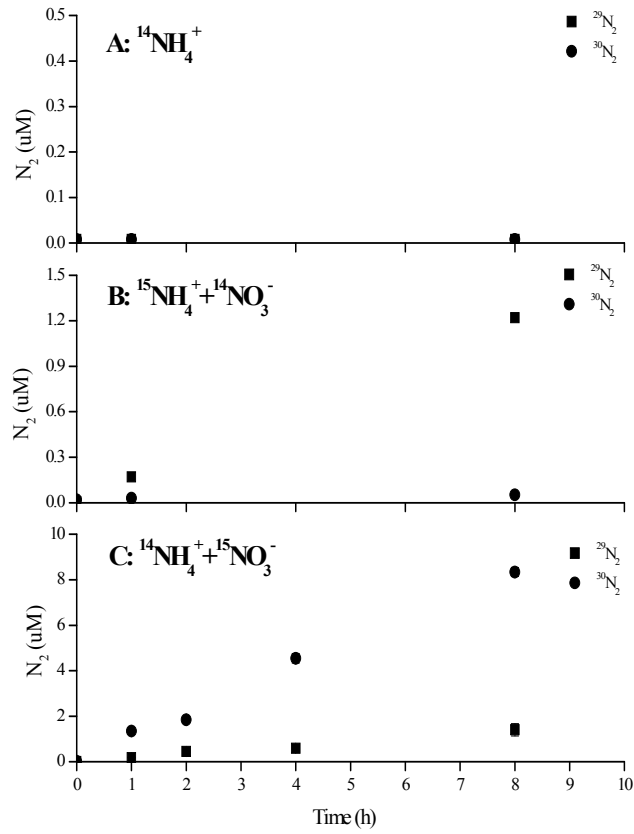

3  
4  
5  
6  
7  
8  
9  
10  
11  
12  
13  
14  
15  
16  
17  
18  
19  
20  
21  
22  
23

**Fig. S2** Examples of concentrations of <sup>29</sup>N<sub>2</sub> and <sup>30</sup>N<sub>2</sub> in samples amended with <sup>15</sup>N labeled on ammonium and nitrate separately

1  
2  
3  
4

**Table S1** The characteristics of slurry manure slurry manure for fertilizing the paddy soil

|          | pH  | COD  | Salinity (‰) | NH <sub>4</sub> <sup>+</sup> | NO <sub>x</sub> <sup>-</sup> | PO <sub>4</sub> <sup>3-</sup> | total nitrogen | total phosphorus |
|----------|-----|------|--------------|------------------------------|------------------------------|-------------------------------|----------------|------------------|
| Sample 1 | 7.6 | 2245 | 0.17         | 782                          | 49                           | 6.5                           | 1282           | 332              |
| Sample 2 | 7.4 | 2318 | 0.22         | 748                          | 55                           | 6.7                           | 1519           | 365              |

Units are mg/L except the pH value.

Table S2 The layout of OUT number and related anammox sequences accession numbers in the tree

| OTU | Sequence number | Sequence ID                                                                                                                                                          |                                                                                                                                                   | Accession number(s)                                                                                                                                                                          |
|-----|-----------------|----------------------------------------------------------------------------------------------------------------------------------------------------------------------|---------------------------------------------------------------------------------------------------------------------------------------------------|----------------------------------------------------------------------------------------------------------------------------------------------------------------------------------------------|
|     |                 | Surface                                                                                                                                                              | Deep                                                                                                                                              |                                                                                                                                                                                              |
| 1#  | 17              |                                                                                                                                                                      | JP16-9, JP16-95, JP16-2, JP16-20, JP16-5, JP16-53, JP16-64, JP8-9, JP16-10, JP16-33, JP16-65, JP16-82, JP16-30, JP16-78, JP16-35, JP16-4, JP16-45 | GU083876, GU083880, GU083882, GU083883, GU083884, GU083885, GU083887, GU083888, GU083889, GU083890, GU083893, GU083894, GU083897, GU083898, GU083899, GU083900, GU083901                     |
| 2#  | 11              |                                                                                                                                                                      | JP8-3, JP16-23, JP8-4, JP16-57, JP16-61, JP16-3, JP16-41, JP8-51, JP16-42, JP8-6, JP8-8                                                           | GU083872, GU083873, GU083874, GU083875, GU083879, GU083881, GU083891, GU083892, GU083895, GU083896, GU083928                                                                                 |
| 3#  | 1               |                                                                                                                                                                      | JP16-11                                                                                                                                           | GU083886                                                                                                                                                                                     |
| 4#  | 5               |                                                                                                                                                                      | JP8-57, JP8-11, JP8-31, JP8-1, JP8-13                                                                                                             | GU083902, GU083903, GU083927, GU083933, GU083937                                                                                                                                             |
| 5#  | 2               |                                                                                                                                                                      | JP8-19, JP8-17                                                                                                                                    | GU083907, GU083935                                                                                                                                                                           |
| 6#  | 1               |                                                                                                                                                                      | JP8-14                                                                                                                                            | GU083936                                                                                                                                                                                     |
| 7#  | 12              |                                                                                                                                                                      | JP16-17, JP16-1, JP8-5, JP16-8, JP16-16, JP16-98, JP16-15, JP16-27, JP16-79, JP16-7, JP16-34, JP16-13                                             | GU083904, GU083905, GU083906, GU083908, GU083923, GU083924, GU083925, GU083929, GU083930, GU083931, GU083932, GU083934                                                                       |
| 8#  | 14              | JP10-87, JP10-88, JP2-42, JP2-19, JP2-24, JP2-35, JP2-36, JP2-12, JP2-11, JP2-22, JP10-11, JP2-17, JP2-10, JP2-43                                                    |                                                                                                                                                   | GU083909, GU083910, GU083911, GU083912, GU083913, GU083914, GU083915, GU083916, GU083917, GU083919, GU083920, GU083921, GU083922, GU083944                                                   |
| 9#  | 1               | JP2-3                                                                                                                                                                |                                                                                                                                                   | GU083918                                                                                                                                                                                     |
| 10# | 19              | JP10-13, JP10-28, JP10-30, JP10-32, JP10-1, JP10-2, JP10-3, JP10-4, JP10-76, JP10-5, JP10-92, JP10-22, JP10-6, JP10-10, JP10-101, JP10-102, JP10-16, JP10-37, JP10-9 |                                                                                                                                                   | GU083945, GU083946, GU083947, GU083948, GU083949, GU083950, GU083951, GU083952, GU083863, GU083864, GU083865, GU083866, GU083867, GU083868, GU083869, GU083870, GU083871, GU083877, GU083878 |
| 11# | 7               | JP10-78, JP10-41, JP10-79, JP10-91, JP10-89, JP2-9, JP10-61                                                                                                          |                                                                                                                                                   | GU083926, GU083938, GU083939, GU083940, GU083941, GU083942, GU083943                                                                                                                         |
